# Supplementary material for: An Interaction Network Predicted from Public Data as a Discovery Tool: Application to the Hsp90 Molecular Chaperone Machine
Source: PubMed Central journal article supplement (PMC3195953; doi:10.1371/journal.pone.0026044), 2011-10-11
Supplement: pone.0026044.s001.pdf [file pone.0026044.s001.pdf]

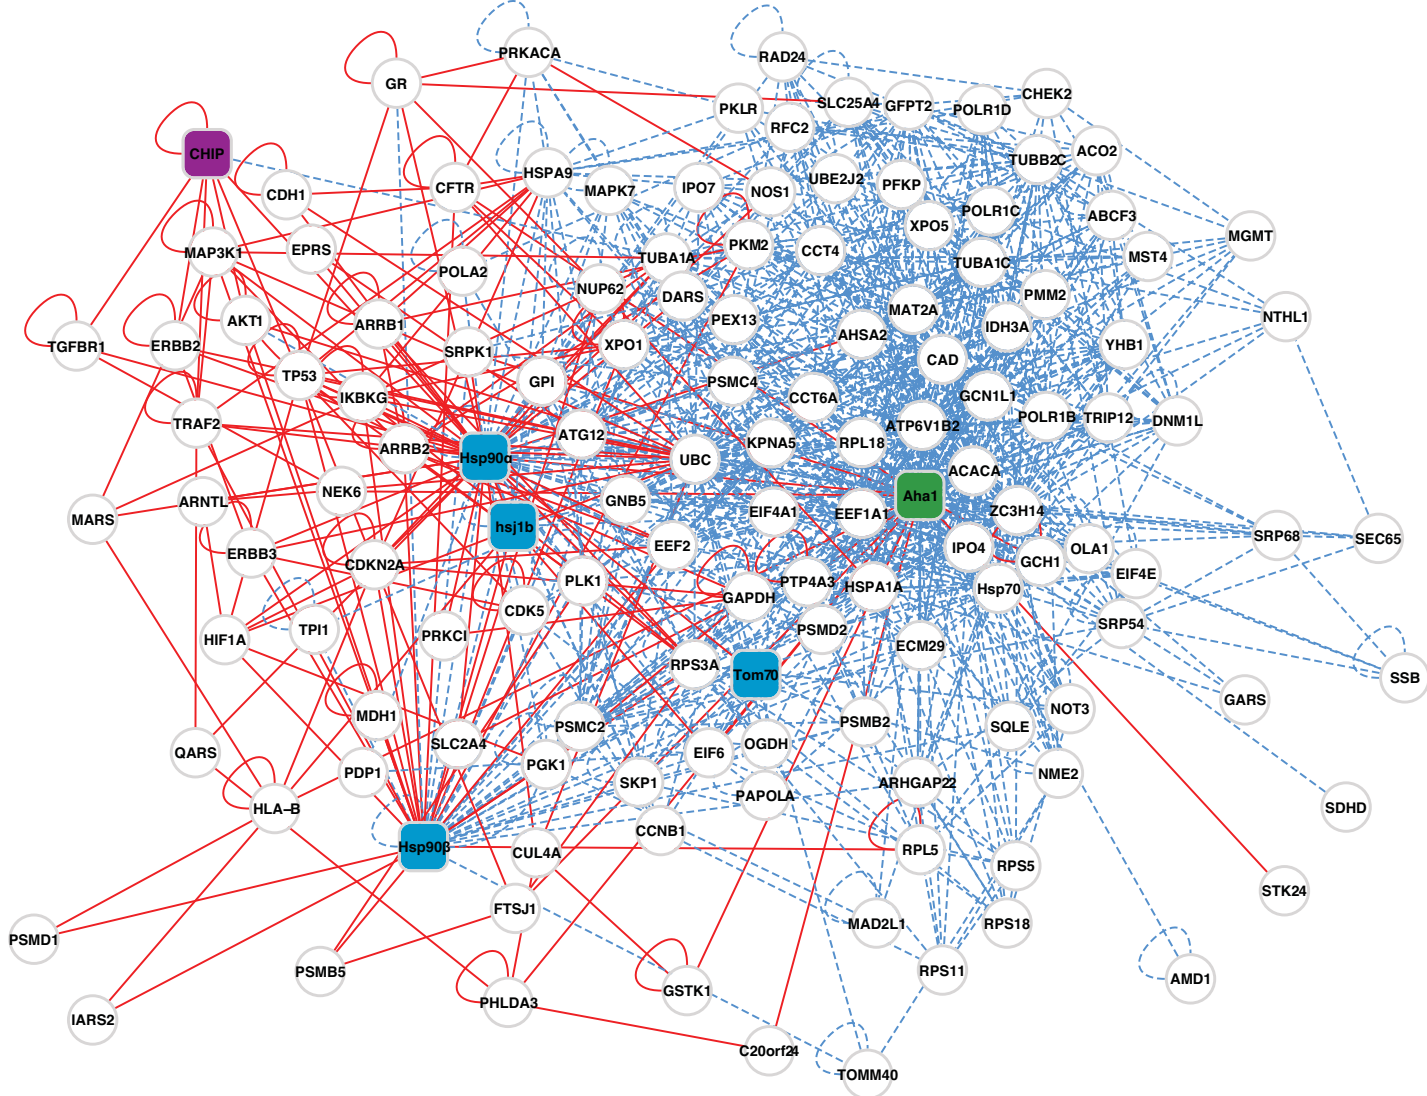

**Figure S1. Aha1 PPI network.** Interactors of Aha1 itself and the ones of the core chaperones Hsp90 $\alpha$  and Hsp90 $\beta$  that share functional terms with Aha1 interactors. The colors, shapes and line formats are the same as in Figure 2.
