# Supplementary material for: An Interaction Network Predicted from Public Data as a Discovery Tool: Application to the Hsp90 Molecular Chaperone Machine
Source: PubMed Central journal article supplement (PMC3195953; doi:10.1371/journal.pone.0026044), 2011-10-11
Supplement: pone.0026044.s005.pdf [file pone.0026044.s005.pdf]

**Table S2. Query proteins.** TPR, co-chaperone containing tetratricopeptide repeats; CS, co-chaperone containing a "CHORD and Sgt1" domain.

| Official gene name | Common name    | Member type | Uniprot ID | Extended Name                                           | PubMed ID   |
|--------------------|----------------|-------------|------------|---------------------------------------------------------|-------------|
| HSP90AA1           | Hsp90 $\alpha$ | chaperone   | P07900     | Heat shock protein HSP 90-alpha                         | 12475174    |
| HSP90AB1           | Hsp90 $\beta$  | chaperone   | P08238     | Heat shock protein HSP 90-beta                          | 12475174    |
| TRAP1              | TRAP1          | chaperone   | Q12931     | Heat shock protein 75 kDa, mitochondrial                | 16269234    |
| HSP90B1            | Grp94          | chaperone   | P14625     | Endoplasmic                                             | 16269234    |
| HSPA1A/B           | Hsp70          | chaperone   | P08107     | Heat shock 70 kDa protein 1A/1B                         | 12475174    |
| HSPA8              | Hsc70          | chaperone   | P11142     | Heat shock cognate 71 kDa protein                       | 9269769     |
| HSPA2              | Hsp72          | chaperone   | P54652     | Heat shock-related 70 kDa protein 2                     | 18772114    |
| HSPD1              | Hsp60          | chaperone   | P10809     | 60 kDa heat shock protein, mitochondrial                | 18984579    |
| DNAJB1             | Hsp40          | chaperone   | P25685     | DnaJ homolog subfamily B member 1                       | 12475174    |
| GRPEL1             | hsj1b          | chaperone   | Q9HAV7     | GrpE protein homolog 1, mitochondrial                   | 10983842    |
| TOMM70A            | Tom70          | chaperone   | O94826     | Mitochondrial import receptor subunit TOM70             | 12526792    |
| CDC37              | Cdc37          | cochaperone | Q16543     | Hsp90 co-chaperone Cdc37                                | 12475174    |
| AHSA1              | Aha1           | cochaperone | O95433     | Activator of 90 kDa heat shock protein ATPase homolog 1 | 12504007    |
| FKBP5              | FKBP51         | TPR         | Q13451     | Peptidyl-prolyl cis-trans isomerase FKBP5               | 12475174    |
| FKBP4              | FKBP52         | TPR         | Q02790     | Peptidyl-prolyl cis-trans isomerase FKBP4               | 12475174    |
| PPP5C              | PP5            | TPR         | P53041     | Serine/threonine-protein phosphatase 5                  | 10400612    |
| STUB1              | CHIP           | TPR         | Q9UNE7     | STIP1 homology and U box-containing protein 1           | 12475174    |
| FKBPL              | Wisp39         | TPR         | Q9UIM3     | FK506-binding protein-like                              | 1734870     |
| UNC45B             | UNC45          | TPR         | Q8IWX7     | Protein unc-45 homolog B                                | 11809970    |
| STIP1              | Hop            | TPR         | P31948     | Stress-induced-phosphoprotein 1                         | 12475174    |
| S100A1             | S100A1         | TPR         | P23297     | Protein S100-A1                                         | 14638689    |
| AIP                | Xap2           | TPR         | O00170     | AH receptor-interacting protein                         | 19375531    |
| FKBP8              | FKBP38         | TPR         | Q14318     | Peptidyl-prolyl cis-trans isomerase FKBP8               | 17024179    |
| TTC4               | Ttc4           | TPR         | O95801     | Tetratricopeptide repeat protein 4                      | 9819421     |
| PPID               | CYP40          | TPR         | Q08752     | Peptidyl-prolyl cis-trans isomerase D                   | 12475174    |
| SVIP               | Vcp/p97        | TPR         | Q8NHG7     | Small VCP/p97-interacting protein                       | 17785525    |
| PIH1D1             | NOP17          | TPR         | Q9NWS0     | PIH1 domain-containing protein 1                        | 17348703    |
| TTC1               | TPR1           | TPR         | Q99614     | Tetratricopeptide repeat protein 1                      | 17348703    |
| DNAJC7             | TPR2           | TPR         | Q99615     | DnaJ homolog subfamily C member 7                       | 17348703    |
| NASP               | Nasp           | TPR         | P49321     | Nuclear autoantigenic sperm protein                     | 15533935    |
| PTGES3             | p23            | CS          | Q15185     | Prostaglandin E synthase 3                              | 12475174    |
| PTPLAD1            | BIND1          | CS          | Q9P035     | Protein tyrosine phosphatase-like protein PTPLAD1       | 18160438    |
| CHORDC1            | CHORDC1        | CS          | Q9UHD1     | Cysteine and histidine-rich domain-containing protein 1 | 15642353    |
| SUGT1              | SUGT1          | CS          | Q9Y2Z0     | Suppressor of G2 allele of SKP1 homolog                 | 17348703    |
| ITGB1BP2           | Melusin        | CS          | Q9UKP3     | Integrin beta-1-binding protein 2                       | 18474241    |
| AARSD1             | AARSD1         | CS          | Q9BTE6     | Alanyl-tRNA editing protein Aarsd1                      | unpublished |
| CACYBP             | SIP            | CS          | Q9HB71     | Calcyclin-binding protein                               | 15271357    |
| NUDC               | NUDC           | CS          | Q9Y266     | Nuclear migration protein nudC                          | 17348703    |
| CUL5               | Cullin5        | other       | Q93034     | Cullin-5                                                | 19933325    |
